# Supplementary material for: Increasing summer rainfall in arid eastern-Central Asia over the past 8500 years
Source: PubMed Central journal article supplement — Sci Rep. 2014 Jun 13;4:5279. doi: 10.1038/srep05279 (PMC4055903; doi:10.1038/srep05279), 2014-06-13
Supplement: srep05279-s1.pdf [file srep05279-s1.pdf]

## **Increasing summer rainfall in arid eastern-Central Asia over the past 8500 years**

Bing Hong<sup>a</sup>, Françoise Gasse<sup>b</sup>, Masao Uchida<sup>c</sup>, Yetang Hong<sup>a,\*</sup>, Xuetian Leng<sup>d</sup>, Yasuyuki Shibata<sup>c</sup>, Ning An<sup>a</sup>, Yongxuan Zhu<sup>a</sup>, Yu Wang<sup>a</sup>

<sup>a</sup>*State Key Laboratory of Environmental Geochemistry, The Institute of Geochemistry, Chinese Academy of Sciences, 46 Guanshui Road, Guiyang, Guizhou 550002, China*

<sup>b</sup>*CEREGE, B.P. 80, 13545, Aix-en-Provence Cedex 04, France*

<sup>c</sup>*Center for Environmental measurement and analysis, National Institute for Environmental Studies, Onogawa 16-2, Tsukuba, Ibaraki, 305-0053 Japan*

<sup>d</sup>*Institute of Peatmire, Northeast Normal University, Changchun, Jilin 130024, China*

\**Corresponding author. E-mail address: hongyetang@vip.skleg.cn*

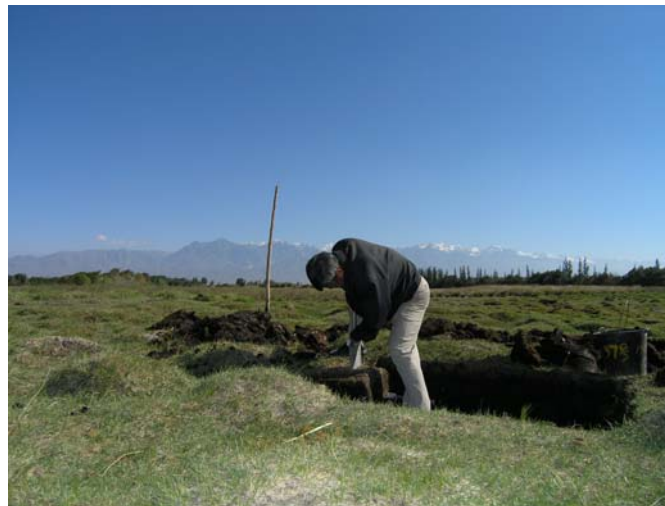

Figure S1. The Chaiwobu peatland. The distance is the East Tianshan Mountains.  
Photo by B. Hong.

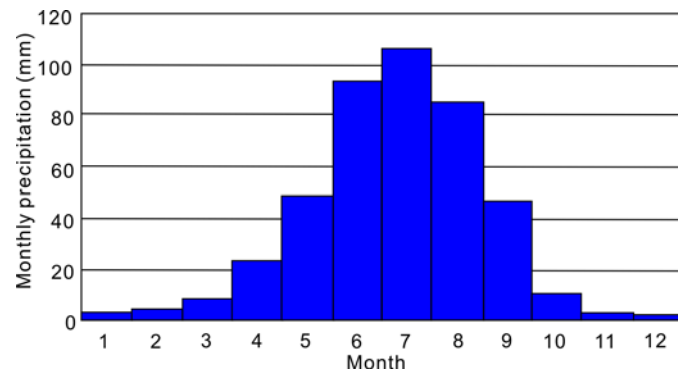

Figure S2. Monthly precipitation pattern at Urumuqi district<sup>8</sup>.
